# Supplementary material for: Predominance of Candida Glabrata among Non-albicans Candida Species in a 16-Year Study of Candidemia at a Tertiary Care Center in Lebanon
Source: PubMed Central journal article supplement (PMC7832319; doi:10.3390/pathogens10010082), 2021-01-19
Supplement: pathogens-10-00082-s001.pdf [file pathogens-10-00082-s001.pdf]

**Table S1.** Antifungal susceptibility of *Candida* isolates to amphotericin B and caspofungin. %resistant: percentage of isolates resistant to antifungal.

| <i>Candida</i> species                      | n  | Amphotericin B |              |           |             | Caspofungin |           |           |            |
|---------------------------------------------|----|----------------|--------------|-----------|-------------|-------------|-----------|-----------|------------|
|                                             |    | Sensitive      | intermediate | resistant | % resistant | n           | sensitive | resistant | %resistant |
| <i>C. albicans</i>                          | 20 | 20             | 0            | 0         | 0.0%        | 5           | 5         | 0         | 0.0%       |
| <i>C. glabrata</i>                          | 20 | 19             | 0            | 1         | 5.0%        | 5           | 5         | 0         | 0.0%       |
| <i>C. tropicalis</i>                        | 8  | 8              | 0            | 0         | 0.0%        | 2           | 2         | 0         | 0.0%       |
| <i>C. parapsilosis</i>                      | 5  | 5              | 0            | 0         | 0.0%        | 1           | 1         | 0         | 0.0%       |
| <i>P. kudriavzevii</i> ( <i>C. krusei</i> ) | 2  | 2              | 0            | 0         | 0.0%        | 0           | 0         | 0         | 0.0%       |
| <i>K. marxianus</i> ( <i>C. kefyr</i> )     | 2  | 2              | 0            | 0         | 0.0%        | 1           | 1         | 0         | 0.0%       |
| <i>C. lusitanae</i>                         | 1  | 0              | 1            | 0         | 0.0%        | 0           | 0         | 0         | 0.0%       |
| Total                                       | 58 | 56             | 1            | 1         | 1.7%        | 14          | 14        | 0         | 0.0%       |

**Table S2.** Univariate analysis of possible risk factors associated with 30-day mortality. Data are presented as percentages unless otherwise specified. CLABSI: Central Line-Associated Bloodstream Infection. \*:p-values<0.05

| Characteristic                   | Alive at 30 days          | Dead at 30 days | p-value           |
|----------------------------------|---------------------------|-----------------|-------------------|
| Age (years, mean ± SD)           | 61.4 ± 18.6               | 70 ± 14.9       | <b>0.002*</b>     |
| Female                           | 47.90                     | 49.50           | 0.848             |
| Year of admission                |                           |                 |                   |
|                                  | 2004-2009                 | 19.2            | 15.4              |
|                                  | 2010-2014                 | 45.2            | 30.8              |
|                                  | 2015-2019                 | 35.6            | 53.8              |
| Critical care unit               | 27.4                      | 64.8            | <b>&lt;0.001*</b> |
| Diabetes mellitus                | 27.4                      | 30.8            | 0.637             |
| Hemodialysis patient             | 13.7                      | 20.9            | 0.231             |
|                                  | End-stage renal disease   | 6.8             | 5.5               |
|                                  | Acute kidney injury       | 6.8             | 15.4              |
| Solid organ transplant recipient | 0.0                       | 2.2             | 0.503             |
| Stem cell transplant recipient   | 4.1                       | 4.40            | 1.00              |
|                                  | Auto-transplant           | 33.3            | 50.0              |
|                                  | Allo-transplant           | 33.3            | 50.0              |
|                                  | Both                      | 33.3            | 0.0               |
| Neutropenic                      | 6.8                       | 17.6            | <b>0.041*</b>     |
|                                  | 1000-1500/mm <sup>3</sup> | 20.0            | 12.5              |
|                                  | 500-1000/mm <sup>3</sup>  | 0.0             | 37.5              |
|                                  | <500/mm <sup>3</sup>      | 80.0            | 50.0              |
| Immunocompromised                | 56.2                      | 70.3            | 0.060             |
| Current steroids                 | 16.4                      | 25.3            | 0.170             |

|                                                   |                                     |             |             |                   |
|---------------------------------------------------|-------------------------------------|-------------|-------------|-------------------|
| Congenital syndromes                              |                                     | 2.7         | 1.1         | 0.586             |
| Other immunosuppressants                          |                                     | 2.7         | 6.6         | 0.301             |
| Malignancy                                        |                                     | 46.6        | 53.8        | 0.355             |
|                                                   | Non-hematologic                     | 23.5        | 24.5        |                   |
|                                                   | Hematologic                         | 73.5        | 69.4        | 0.926             |
|                                                   | Both                                | 2.9         | 6.1         |                   |
| Chemotherapy                                      |                                     | 24.7        | 22.0        | 0.686             |
|                                                   | <1 week from infection              | 33.3        | 20.0        | 0.468             |
| Immunotherapy                                     |                                     |             |             |                   |
| Abdominal surgery within 30 days                  |                                     | 31.5        | 23.1        | 0.226             |
| Antibiotics within 30 days                        |                                     | 95.9        | 93.4        | 0.732             |
| Antifungal history                                |                                     | 23.3        | 28.6        | 0.445             |
|                                                   | Fluconazole                         | 19.2        | 18.7        | 0.936             |
|                                                   | Voriconazole                        | 1.4         | 1.1         | 1.00              |
|                                                   | Amphotericin B                      | 1.4         | 3.3         | 0.63              |
|                                                   | Caspofungin                         | 1.4         | 5.5         | 0.227             |
|                                                   | Anidulafungin                       | 0.0         | 2.2         | 0.503             |
| Duration of previous antifungal (days, mean ± SD) |                                     | 9.13 ± 12.2 | 16.7 ± 17.9 | 0.152             |
| Parenteral nutrition                              |                                     | 27.4        | 25.3        | 0.759             |
| Central venous catheter                           |                                     | 63.0        | 75.8        | 0.075             |
| Source                                            |                                     |             |             |                   |
|                                                   | CLABSI                              | 27.4        | 19.8        | 0.251             |
|                                                   | Gastrointestinal translocation      | 35.6        | 33.0        | 0.722             |
|                                                   | Urinary tract infection             | 13.7        | 6.6         | 0.128             |
|                                                   | Unknown                             | 19.2        | 38.5        | <b>0.007*</b>     |
|                                                   | Other                               | 1.4         | 1.1         | 1.00              |
| Candida non-albicans                              |                                     | 61.6        | 63.7        | 0.783             |
| Echocardiography                                  |                                     | 63.0        | 46.2        | <b>0.031*</b>     |
| Ophthalmic exam                                   |                                     | 28.8        | 14.3        | <b>0.023*</b>     |
| Empiric therapy                                   |                                     |             |             |                   |
|                                                   | Fluconazole                         | 40.6        | 30.9        | 0.236             |
|                                                   | Voriconazole                        | 1.4         | 1.5         | 1.00              |
|                                                   | Itraconazole                        | 4.3         | 2.9         | 1.00              |
|                                                   | Caspofungin                         | 27.5        | 29.4        | 0.808             |
|                                                   | Anidulafungin                       | 7.2         | 19.1        | <b>0.04*</b>      |
|                                                   | Micafungin                          | 10.1        | 8.8         | 0.792             |
|                                                   | Lipid formulation of amphotericin B | 8.7         | 7.4         | 0.772             |
| Central venous catheter removed                   |                                     | 91.3        | 53.6        | <b>&lt;0.001*</b> |
|                                                   | Tip sent for culture                | 88.1        | 78.4        | 0.245             |
